# Supplementary material for: Strong Ruδ+–Ce3+ electronic interaction induced by a CeOy overlayer for enhanced low-temperature N2-to-NH3 conversion
Source: Royal Society of Chemistry journal article supplement (doi:10.1039/d2cy02041f), 2023-01-01
Supplement: d2cy02041f1.pdf [file d2cy02041f1.pdf]

**Strong Ru<sup>δ+</sup>-Ce<sup>3+</sup> electronic interaction induced by CeO<sub>y</sub> overlayer  
for enhanced low temperature N<sub>2</sub>-to-NH<sub>3</sub> conversion**

Lingling Li<sup>#</sup>, Mingyuan Zhang<sup>#</sup>, Tianhua Zhang, Yinglong Gao, Jun Ni\*, Yanliang  
Zhou, Jianxin Lin, Xiuyun Wang\*, Lilong Jiang

National Engineering Research Center of Chemical Fertilizer Catalyst, Fuzhou  
University, Fujian 350002, P. R. China.

<sup>#</sup>These authors contributed equally to this work.

\*Corresponding author.

E-mail address: nj@fzu.edu.cn (J. Ni); xywangfzu@163.com (X. Wang).

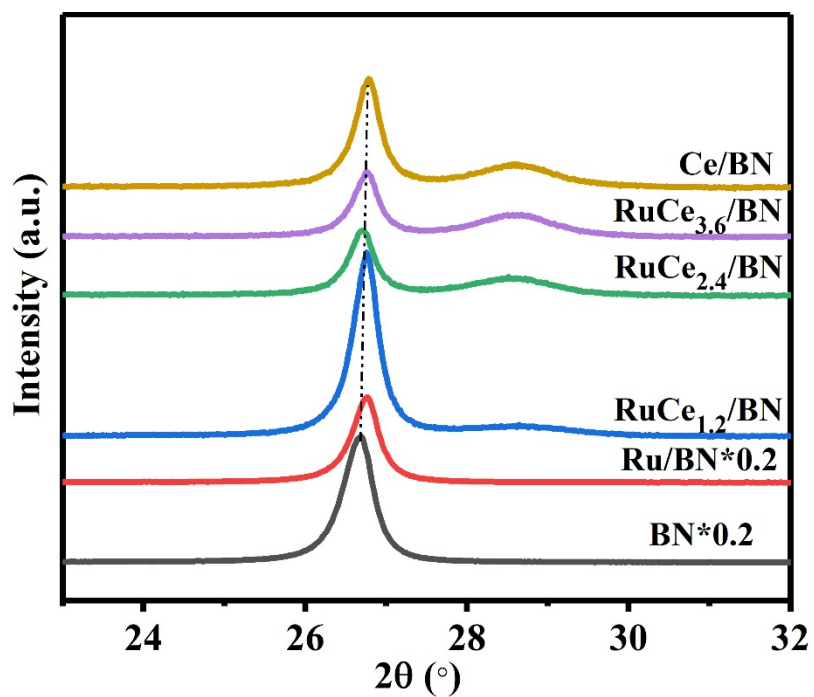

**Figure S1.** Enlarged XRD patterns at  $2\theta$  in the range of 23–32° over as-prepared catalysts.

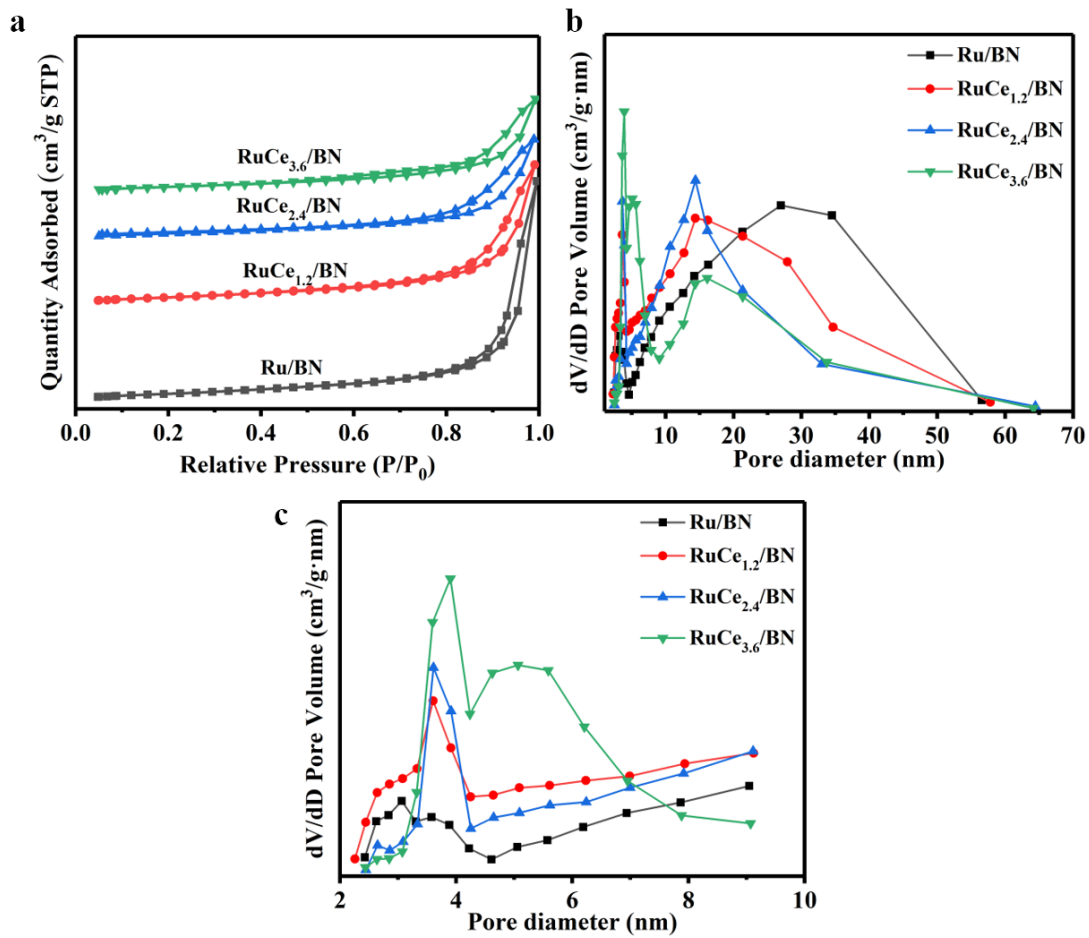

**Figure S2.** a. Nitrogen adsorption–desorption isotherms, b. pore-size distribution profiles and c. partially enlarged pore-size distribution of Ru/BN, RuCe<sub>1.2</sub>/BN, RuCe<sub>2.4</sub>/BN and RuCe<sub>3.6</sub>/BN.

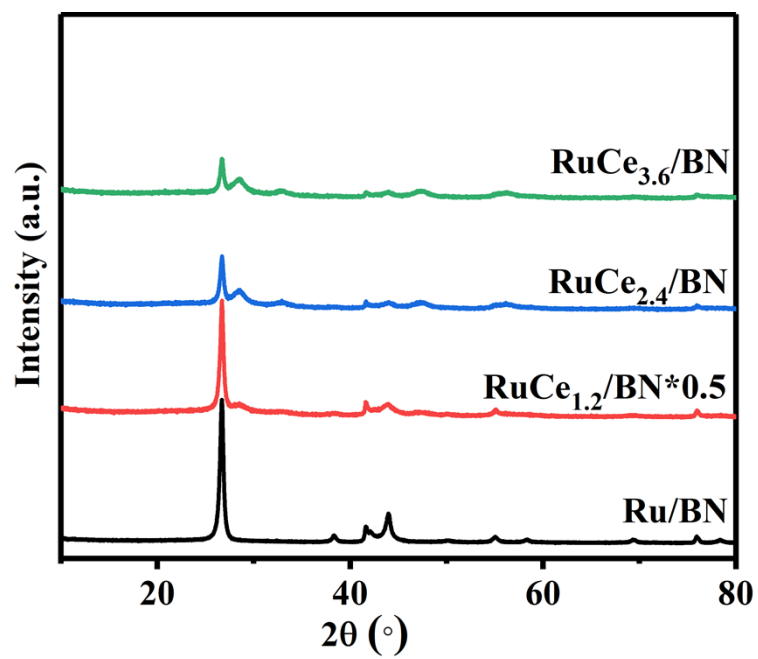

Figure S3. XRD patterns over the used catalysts.

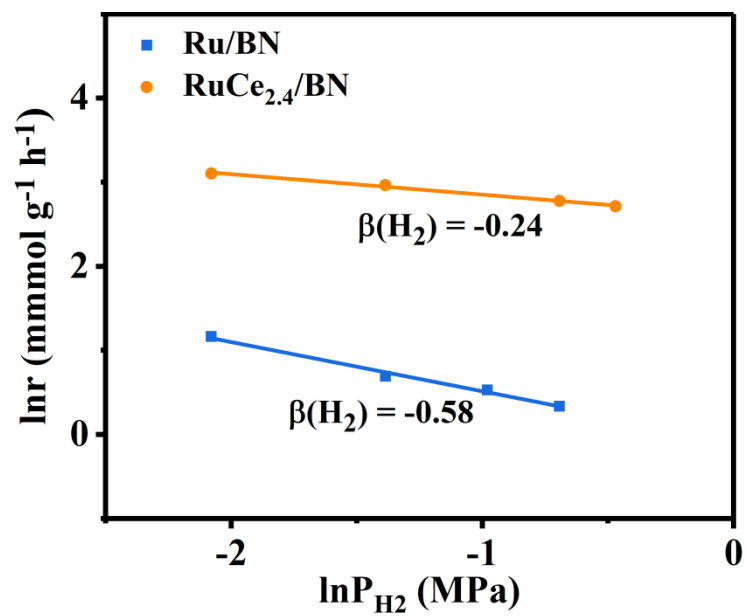

**Figure S4.** H<sub>2</sub> reaction order over Ru/BN and RuCe<sub>2.4</sub>/BN catalysts.

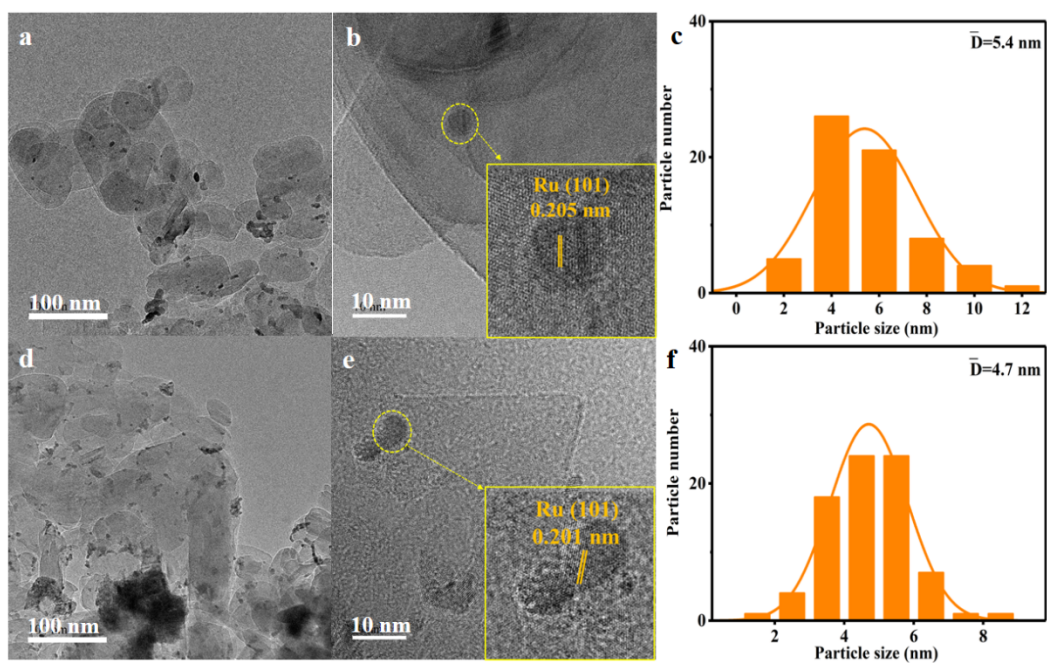

**Figure S5.** TEM and HR-TEM images as well as particle distribution profiles of **a-c** Ru/BN and **d-f** RuCe<sub>2.4</sub>/BN.

**Table S1.** Physicochemical properties over RuCe<sub>x</sub>/BN catalysts.

| Sample                  | Ce/Ru molar ratio | Ru content <sup>a</sup> (wt.%) | Ce content <sup>a</sup> (wt.%) | BET surface area <sup>b</sup> (m <sup>2</sup> g <sup>-1</sup> ) | Average pore diameter <sup>b</sup> (nm) | H <sub>2</sub> consumption (mmol g <sub>Ru</sub> <sup>-1</sup> ) <sup>c</sup> |
|-------------------------|-------------------|--------------------------------|--------------------------------|-----------------------------------------------------------------|-----------------------------------------|-------------------------------------------------------------------------------|
| Ru/BN                   | 0                 | 4.5                            | 0                              | 45                                                              | 26                                      | 20                                                                            |
| RuCe <sub>1.2</sub> /BN | 1.0               | 3.6                            | 5.9                            | 42                                                              | 18                                      | 57                                                                            |
| RuCe <sub>2.4</sub> /BN | 2.4               | 3.0                            | 10.2                           | 45                                                              | 16                                      | 62                                                                            |
| RuCe <sub>3.6</sub> /BN | 3.6               | 3.0                            | 14.9                           | 52                                                              | 14                                      | 52                                                                            |

<sup>a</sup>ICP results.

<sup>b</sup>Obtained from N<sub>2</sub> physisorption measurement.

<sup>c</sup>Obtained from H<sub>2</sub>-TPR result.

**Table S2.** Crystallite sizes and lattice parameters over the as-prepared samples<sup>a</sup>.

| sample                  | crystallite size<br>(nm) | a<br>(Å) | b<br>(Å) | c<br>(Å) |
|-------------------------|--------------------------|----------|----------|----------|
| BN                      | 15                       | 2.507    | 2.507    | 6.888    |
| Ru/BN                   | 17                       | 2.507    | 2.507    | 6.888    |
| RuCe <sub>1.2</sub> /BN | 17                       | 2.507    | 2.507    | 6.885    |
| RuCe <sub>2.4</sub> /BN | 17                       | 2.508    | 2.508    | 6.893    |
| RuCe <sub>3.6</sub> /BN | 17                       | 2.507    | 2.507    | 6.891    |
| Ce/BN                   | 17                       | 2.505    | 2.505    | 6.877    |

<sup>a</sup>XRD results for the BN phase in the samples.



**Table S3.** Surface Ru contents and  $\text{Ce}^{3+}/(\text{Ce}^{3+}+\text{Ce}^{4+})$  ratios over  $\text{RuCe}_x/\text{BN}$  catalysts obtained from XPS results.

| Sample                        | Ru (%) | $\text{Ce}^{3+}/(\text{Ce}^{3+}+\text{Ce}^{4+})$ (%) |
|-------------------------------|--------|------------------------------------------------------|
| Ru/BN                         | 0.6    | -                                                    |
| $\text{RuCe}_{1,2}/\text{BN}$ | 0.4    | 27                                                   |
| $\text{RuCe}_{2,4}/\text{BN}$ | 0.3    | 34                                                   |
| $\text{RuCe}_{3,6}/\text{BN}$ | 0.3    | 29                                                   |

**Table S4.** NH<sub>3</sub> synthesis performance over various Ru-based catalysts reported in this work and previous literatures under the given conditions.

| Sample                                                   | Ru content<br>(wt.%) | T<br>(°C) | P<br>(MPa) | WHSV<br>(mL·g <sup>-1</sup> ·h <sup>-1</sup> ) | NH <sub>3</sub> synthesis rate<br>(mmol <sub>NH<sub>3</sub></sub> g <sub>cat</sub> <sup>-1</sup> h <sup>-1</sup> ) | TOF <sub>Ru sur</sub><br>(10 <sup>-3</sup> s <sup>-1</sup> ) | E <sub>a</sub><br>(kJ mol <sup>-1</sup> ) | Ref.      |
|----------------------------------------------------------|----------------------|-----------|------------|------------------------------------------------|--------------------------------------------------------------------------------------------------------------------|--------------------------------------------------------------|-------------------------------------------|-----------|
| RuCe <sub>2.4</sub> /BN                                  | 3.0                  | 400       | 0.2        | 60 000                                         | 9.6                                                                                                                | -                                                            |                                           | This work |
| RuCe <sub>2.4</sub> /BN                                  | 3.0                  | 400       | 1.0        | 60 000                                         | 14.6                                                                                                               | 230                                                          | 68                                        | This work |
| RuCe <sub>2.4</sub> /BN                                  | 3.0                  | 350       | 1.0        | 60 000                                         | 5.8                                                                                                                | 91                                                           | 68                                        | This work |
| Ru/CeO <sub>2</sub>                                      | 3.0                  | 400       | 1.0        | 60 000                                         | 0.5                                                                                                                | -                                                            | -                                         | This work |
| Ba/Ru/BN                                                 | 4.5                  | 400       | 5.0        | -                                              | 2.0                                                                                                                | -                                                            | 95                                        | 1         |
| Ru-Cs/MgO                                                | 6.0                  | 400       | 0.1        | 18 000                                         | 3.3                                                                                                                | 8                                                            | 73                                        | 2         |
| Ru/C12A7:e <sup>-</sup>                                  | 4.0                  | 400       | 0.1        | 18 000                                         | 2.1                                                                                                                | 76                                                           | 56                                        | 2         |
| Ru/LaCoSi                                                | 4.3                  | 400       | 0.1        | 18 000                                         | 3.4                                                                                                                | 30                                                           | 50                                        | 3         |
| Ru/Y <sub>5</sub> Si <sub>3</sub>                        | 7.8                  | 400       | 0.1        | 18 000                                         | 1.9                                                                                                                | 70                                                           | 52                                        | 4         |
| Ru/Ca <sub>2</sub> N:e <sup>-</sup>                      | 1.8                  | 300       | 0.1        | 36 000                                         | 1.7                                                                                                                | 91                                                           | 60                                        | 5         |
| Ru/r-CeO <sub>2</sub>                                    | 4.0                  | 400       | 1.         | 18 000                                         | 3.8                                                                                                                | -                                                            | 108                                       | 6         |
| Ru/BaZr <sub>0.9</sub> Y <sub>0.1</sub> O <sub>3-δ</sub> | 2.0                  | 400       | 0.1        | 36 000                                         | 4.0                                                                                                                | -                                                            | -                                         | 7         |
| YRu <sub>2</sub>                                         | 69.5                 | 400       | 0.1        | 18 000                                         | 0.5                                                                                                                | 19                                                           | 73                                        | 8         |
| LaRuSi                                                   | 37.7                 | 340       | 0.1        | 36 000                                         | 0.8                                                                                                                | 28                                                           | 40                                        | 9         |

## References

1. D. Szmigiela, W. Raróg-Pilecka, E. Miśkiewicz, E. Maciejewska, Z. Kaszukur, J. W. Sobczak and Z. Kowalczyk, *Catal. Lett.*, 2005, **100**, 79-87.
2. M. Hara, M. Kitano and H. Hosono, *ACS Catal.*, 2017, **7**, 2313-2324.
3. Y. Gong, H. Li, J. Wu, X. Song, X. Yang, X. Bao, X. Han, M. Kitano, J. Wang and H. Hosono, *J. Am. Chem. Soc.*, 2022, **144**, 8683-8692.
4. Y. Lu, J. Li, T. Tada, Y. Toda, S. Ueda, T. Yokoyama, M. Kitano and H. Hosono, *J. Am. Chem. Soc.*, 2016, **138**, 3970-3973.
5. M. Kitano, Y. Inoue, H. Ishikawa, K. Yamagata, T. Nakao, T. Tada, S. Matsuishi, T. Yokoyama, M. Hara and H. Hosono, *Chem. Sci.*, 2016, **7**, 4036-4043.
6. Z. Ma, S. Zhao, X. Pei, X. Xiong and B. Hu, *Catal. Sci. Technol.*, 2017, **7**, 191-199.
7. N. Shimoda, Y. Kimura, Y. Kobayashi, J. Kubota and S. Satokawa, *Intl. J. Hydrogen Energ.*, 2017, **42**, 29745-29755.
8. T. Ogawa, Y. Kobayashi, H. Mizoguchi, M. Kitano, H. Abe, T. Tada, Y. Toda, Y. Niwa and H. Hosono, *J. Phys. Chem. C*, 2018, **122**, 10468-10475.
9. J. Li, J. Wu, H. Wang, Y. Lu, T. Ye, M. Sasase, X. Wu, M. Kitano, T. Inoshita and H. Hosono, *Chem. Sci.*, 2019, **10**, 5712-5718.
